# Supplementary material for: Tectonics, climate and the diversification of the tropical African terrestrial flora and fauna
Source: PubMed Central journal article supplement — Biol Rev Camb Philos Soc. 2020 Sep 13;96(1):16–51. doi: 10.1111/brv.12644 (PMC7821006; doi:10.1111/brv.12644), 2020-09-13
Supplement: BRV-96-16-s002.pdf [file BRV-96-16-s002.pdf]

| <i>Reference</i>                       | <i>Clade</i> | <i>DOI or stable link</i>        | <i>Family</i>  | <i>Genus</i>                                         | <b>Crown age (Ma)</b> | <b>Stem age (Ma)</b> | <b>Total sp. in clade</b> | <b>Sampled sp.</b> |
|----------------------------------------|--------------|----------------------------------|----------------|------------------------------------------------------|-----------------------|----------------------|---------------------------|--------------------|
| <b>Bittencourt-Silva et al. (2016)</b> | Amphibia     | 10.1016/j.ympcv.2016.03.021      | Pyxicephalidae | Tomopterna                                           | 19                    | 35.99                | 16                        | 8                  |
| <b>Evans et al. (2015)</b>             | Amphibia     | 10.1371/journal.pone.0142823     | Pipidae        | <i>Xenopus</i>                                       | 27.5                  | 70                   | 29                        | 29                 |
| <b>Jongsma et al. (2018)</b>           | Amphibia     | 10.1016/j.ympcv.2017.12.006      | Ranidae        | Amnirana                                             | 36.7                  | 31.7                 | 12                        | 10                 |
| <b>Larson et al. (2016)</b>            | Amphibia     | 10.1016/j.ympcv.2016.03.017      | Pyxicephalidae | <i>Amietia</i>                                       | 24.9                  | 44.7                 | 16                        | 11                 |
| <b>Liedtke et al. (2016)</b>           | Amphibia     | 10.1111/evo.12985                | Bufonidae      | Capensibufo                                          | 5.5                   | 23.5                 | 5                         | 2                  |
| <b>Liedtke et al. (2016)</b>           | Amphibia     | 10.1111/evo.12985                | Bufonidae      | Poyntonophrynus                                      | 7.5                   | 17                   | 11                        | 4                  |
| <b>Liedtke et al. (2016)</b>           | Amphibia     | 10.1111/evo.12985                | Bufonidae      | Sclerophrys                                          | 19                    | 23.2                 | 45                        | 24                 |
| <b>Liedtke et al. (2016)</b>           | Amphibia     | 10.1111/evo.12985                | Bufonidae      | Nectophrynoidea                                      | 11.5                  | 17.5                 | 13                        | 11                 |
| <b>Liedtke et al. (2016)</b>           | Amphibia     | 10.1111/evo.12985                | Bufonidae      | Vandijkophrynus                                      | 4                     | 23.2                 | 5                         | 5                  |
| <b>Liedtke et al. (2016)</b>           | Amphibia     | 10.1111/evo.12985                | Bufonidae      | Mertensophryne                                       | 13.3                  | 17                   | 14                        | 8                  |
| <b>Portik et al. (2019)</b>            | Amphibia     | 10.1093/sysbio/syz023            | Hyperoliidae   | <i>Callulina</i>                                     | 19                    | 29                   | 9                         | 9                  |
| <b>Portik et al. (2019)</b>            | Amphibia     | 10.1093/sysbio/syz023            | Hyperoliidae   | <i>Cardioglossa</i>                                  | 24                    | 29.5                 | 19                        | 12                 |
| <b>Portik et al. (2019)</b>            | Amphibia     | 10.1093/sysbio/syz023            | Hyperoliidae   | <i>Breviceps</i>                                     | 23                    | 37                   | 19                        | 8                  |
| <b>Portik et al. (2019)</b>            | Amphibia     | 10.1093/sysbio/syz023            | Hyperoliidae   | <i>Afrizalus</i>                                     | 20.2                  | 25                   | 33                        | 25                 |
| <b>Portik et al. (2019)</b>            | Amphibia     | 10.1093/sysbio/syz023            | Hyperoliidae   | <i>Leptodactylodon</i>                               | 25                    | 45                   | 15                        | 11                 |
| <b>Portik et al. (2019)</b>            | Amphibia     | 10.1093/sysbio/syz023            | Hyperoliidae   | <i>Probreviceps</i>                                  | 15                    | 23                   | 6                         | 4                  |
| <b>Portik et al. (2019)</b>            | Amphibia     | 10.1093/sysbio/syz023            | Hyperoliidae   | <i>Astylosternus</i>                                 | 9                     | 23                   | 12                        | 5                  |
| <b>Portik et al. (2019)</b>            | Amphibia     | 10.1093/sysbio/syz023            | Hyperoliidae   | <i>Hyperolius</i>                                    | 27                    | 31                   | 146                       | 82                 |
| <b>Portik et al. (2019)</b>            | Amphibia     | 10.1093/sysbio/syz023            | Hyperoliidae   | <i>Phlyctimantis</i>                                 | 11                    | 19                   | 5                         | 5                  |
| <b>Portik et al. (2019)</b>            | Amphibia     | 10.1093/sysbio/syz023            | Hyperoliidae   | <i>Arthroleptis</i>                                  | 25                    | 29.5                 | 47                        | 18                 |
| <b>Portik et al. (2019)</b>            | Amphibia     | 10.1093/sysbio/syz023            | Hyperoliidae   | <i>Leptopelis</i>                                    | 35                    | 40.1                 | 53                        | 28                 |
| <b>Portik et al. (2019)</b>            | Amphibia     | 10.1093/sysbio/syz023            | Hyperoliidae   | <i>Kassina</i>                                       | 15                    | 19                   | 15                        | 10                 |
| <b>Damm et al. (2010)</b>              | Arthropoda   | 10.1016/j.ympcv.2009.12.006      | Libellulidae   | <i>Trithemis</i>                                     | 10                    | 12.5                 | 46                        | 38                 |
| <b>Hemp et al. (2015)</b>              | Arthropoda   | 10.1111/syen.12092               | Orthoptera     | <i>Parepistaurus</i>                                 | 2.5                   | 7.5                  | 25                        | 15                 |
| <b>Sahoo et al. (2018)</b>             | Arthropoda   | 10.1016/j.ympcv.2018.02.001      | Nymphalidae    | <i>Hypolimnas</i> (african clade)                    | 11.18                 | 13.42                | 29                        | 26                 |
| <b>van Velzen et al. (2013)</b>        | Arthropoda   | 10.1111/bij.12012                | Nymphilidae    | <i>Cymothoe</i>                                      | 7.13                  | 15                   | 82                        | 52                 |
| <b>Huntley &amp; Voelker (2016)</b>    | Aves         | 10.1016/j.ympcv.2016.04.002      | Pycnonotidae   | <i>Bleda</i>                                         | 7.5                   | 0                    | 4                         | 4                  |
| <b>Huntley &amp; Voelker (2017)</b>    | Aves         | 10.1093/zoolinnean/zlx086        | Pycnonotidae   | <i>Criniger</i>                                      | 6.2                   | 0                    | 5                         | 5                  |
| <b>Huntley &amp; Voelker (2017)</b>    | Aves         | 10.1093/zoolinnean/zlx086        | Sylviidae      | <i>Sylvietta</i>                                     | 5.8                   | 0                    | 9                         | 9                  |
| <b>Njabo et al. (2008)</b>             | Aves         | 10.1016/j.ympcv.2008.01.013      | Platysteiridae | <i>Platysteira</i> (including <i>Dyaphorophyia</i> ) | 15.5                  | 16.4                 | 11                        | 10                 |
| <b>Voelker et al. (2010)</b>           | Aves         | 10.1111/j.1466-8238.2009.00500.x | Muscicapidae   | <i>Sheppardia</i>                                    | 3.23                  | 4.1                  | 12                        | 12                 |

| <i>Reference</i>                              | % sp. sampled | Inferred vegetation zone             | Altitude mean (m) | Altitude minimum (m) | Altitude maximum (m) | Altitude difference (m) | No. of occurrences used from GBIF after cleaning |
|-----------------------------------------------|---------------|--------------------------------------|-------------------|----------------------|----------------------|-------------------------|--------------------------------------------------|
| <b>Bittencourt-Silva <i>et al.</i> (2016)</b> | 50            | premontane                           | 1018              | 6                    | 2530                 | 2524                    | 1521                                             |
| <b>Evans <i>et al.</i> (2015)</b>             | 100           | premontane                           | 1185              | 4                    | 3338                 | 3334                    | 3334                                             |
| <b>Jongsma <i>et al.</i> (2018)</b>           | 83            | lowland                              | 359               | 18                   | 1018                 | 1000                    | 82                                               |
| <b>Larson <i>et al.</i> (2016)</b>            | 69            | premontane                           | 1498              | 13                   | 4062                 | 4049                    | 953                                              |
| <b>Liedtke <i>et al.</i> (2016)</b>           | 40            | premontane                           | 743               | 109                  | 1430                 | 1321                    | 44                                               |
| <b>Liedtke <i>et al.</i> (2016)</b>           | 36            | premontane                           | 837               | 32                   | 1780                 | 1748                    | 285                                              |
| <b>Liedtke <i>et al.</i> (2016)</b>           | 53            | lowland                              | 475               | 4                    | 1901                 | 1897                    | 1260                                             |
| <b>Liedtke <i>et al.</i> (2016)</b>           | 85            | montane                              | 1711              | 233                  | 3120                 | 2887                    | 555                                              |
| <b>Liedtke <i>et al.</i> (2016)</b>           | 100           | premontane                           | 1081              | 11                   | 3098                 | 3087                    | 239                                              |
| <b>Liedtke <i>et al.</i> (2016)</b>           | 57            | premontane                           | 1314              | 8                    | 4339                 | 4331                    | 257                                              |
| <b>Portik <i>et al.</i> (2019)</b>            | 100           | premontane                           | 1345              | 446                  | 2104                 | 1658                    | 111                                              |
| <b>Portik <i>et al.</i> (2019)</b>            | 63            | lowland                              | 594               | 2                    | 1720                 | 1718                    | 262                                              |
| <b>Portik <i>et al.</i> (2019)</b>            | 42            | premontane                           | 812               | 1                    | 2098                 | 2097                    | 815                                              |
| <b>Portik <i>et al.</i> (2019)</b>            | 76            | lowland                              | 520               | 4                    | 2198                 | 2194                    | 2693                                             |
| <b>Portik <i>et al.</i> (2019)</b>            | 73            | premontane                           | 1137              | 18                   | 2337                 | 2319                    | 92                                               |
| <b>Portik <i>et al.</i> (2019)</b>            | 67            | premontane                           | 1490              | 261                  | 2580                 | 2319                    | 188                                              |
| <b>Portik <i>et al.</i> (2019)</b>            | 42            | premontane                           | 918               | 31                   | 2357                 | 2326                    | 283                                              |
| <b>Portik <i>et al.</i> (2019)</b>            | 56            | premontane                           | 717               | 6                    | 2362                 | 2356                    | 2865                                             |
| <b>Portik <i>et al.</i> (2019)</b>            | 100           | premontane                           | 916               | 7                    | 2380                 | 2373                    | 184                                              |
| <b>Portik <i>et al.</i> (2019)</b>            | 38            | premontane                           | 844               | 1                    | 2531                 | 2530                    | 2855                                             |
| <b>Portik <i>et al.</i> (2019)</b>            | 53            | premontane                           | 843               | 4                    | 2890                 | 2886                    | 2804                                             |
| <b>Portik <i>et al.</i> (2019)</b>            | 67            | premontane                           | 811               | 4                    | 3153                 | 3149                    | 1147                                             |
| <b>Damm <i>et al.</i> (2010)</b>              | 83            | premontane                           | 778               | 4                    | 2526                 | 2522                    | 1546                                             |
| <b>Hemp <i>et al.</i> (2015)</b>              | 60            | no data in GBIF, inferred premontane | NA                | NA                   | NA                   | NA                      | NA                                               |
| <b>Sahoo <i>et al.</i> (2018)</b>             | 90            | lowland                              | 585               | 1                    | 2049                 | 2048                    | 895                                              |
| <b>van Velzen <i>et al.</i> (2013)</b>        | 63            | lowland                              | 690               | 1                    | 1973                 | 1972                    | 1038                                             |
| <b>Huntley &amp; Voelker (2016)</b>           | 100           | premontane                           | 769               | 12                   | 1910                 | 1898                    | 429                                              |
| <b>Huntley &amp; Voelker (2017)</b>           | 100           | premontane                           | 762               | 11                   | 1690                 | 1679                    | 222                                              |
| <b>Huntley &amp; Voelker (2017)</b>           | 100           | premontane                           | 955               | 4                    | 2715                 | 2711                    | 652                                              |
| <b>Njabo <i>et al.</i> (2008)</b>             | 91            | premontane                           | 915               | 1                    | 2510                 | 2509                    | 791                                              |
| <b>Voelker <i>et al.</i> (2010)</b>           | 100           | premontane                           | 1265              | 19                   | 2624                 | 2605                    | 380                                              |

| <i>Reference</i>                         | <i>Clade</i>  | <i>DOI or stable link</i>                                                               | <i>Family</i>   | <i>Genus</i>                                                      | <b>Crown age (Ma)</b> | <b>Stem age (Ma)</b> | <b>Total sp. in clade</b> | <b>Sampled sp.</b> |
|------------------------------------------|---------------|-----------------------------------------------------------------------------------------|-----------------|-------------------------------------------------------------------|-----------------------|----------------------|---------------------------|--------------------|
| <b>Voelker et al. (2010)</b>             | Aves          | 10.1111/j.1466-8238.2009.00500.x                                                        | Muscicapidae    | <i>Callene (Cossypha anomala, caffra and archeri group)</i>       | 2.71                  | 4.1                  | 3                         | 3                  |
| <b>Antonelli (2009)</b>                  | Magnoliophyta | 10.1186/1741-7007-7-82                                                                  | Campanulaceae   | <i>Lobelia</i>                                                    | 11.2                  | 24.5                 | 15                        | 3                  |
| <b>Auvrey et al. (2010)</b>              | Magnoliophyta | Book chapter                                                                            | Zingiberaceae   | <i>Afromomum</i>                                                  | 8.4                   | 14.2                 | 61                        | 30                 |
| <b>Bouchenak-Khelladi et al. (2010a)</b> | Magnoliophyta | 10.1016/j.ympcv.2010.07.019                                                             | Mimosoideae     | <i>Senegalia</i>                                                  | 10                    | 19                   | 66                        | 18                 |
| <b>Bouchenak-Khelladi et al. (2010a)</b> | Magnoliophyta | 10.1016/j.ympcv.2010.07.019                                                             | Mimosoideae     | <i>Vachellia</i> (formerly <i>Acacia</i> subgenus <i>Acacia</i> ) | 15                    | 19                   | 32                        | 27                 |
| <b>Couvreur et al. (2011b)</b>           | Magnoliophyta | 10.1186/1471-2148-11-296                                                                | Annonaceae      | <i>Monodora</i>                                                   | 8.5                   | 13.2                 | 14                        | 13                 |
| <b>Couvreur et al. (2011b)</b>           | Magnoliophyta | 10.1186/1471-2148-11-296                                                                | Annonaceae      | <i>Isolona</i>                                                    | 7.5                   | 13.2                 | 20                        | 14                 |
| <b>Davis et al. (2002)</b>               | Magnoliophyta | <a href="https://www.istor.org/stable/3094684">https://www.istor.org/stable/3094684</a> | Malpighiaceae   | <i>Acridocarpus</i> (African clade)                               | 25                    | 35                   | 23                        | 11                 |
| <b>Dimitrov et al. (2012)</b>            | Magnoliophyta | 10.1371/journal.pone.0048908                                                            | Gesneriaceae    | <i>Saintpaulia</i>                                                | 5                     | 31                   | 6                         | 5                  |
| <b>Donkpegan et al. (2017)</b>           | Magnoliophyta | 10.1016/j.ympcv.2016.11.004                                                             | Leguminosae     | <i>Afzelia</i> (plastome dates)                                   | 14.5                  | 33.5                 | 11                        | 6                  |
| <b>Estrella et al. (2017)</b>            | Magnoliophyta | 10.1111/nph.14523                                                                       | Leguminosae     | <i>Tetraberlinia</i>                                              | 9                     | 22                   | 7                         | 4                  |
| <b>Estrella et al. (2017)</b>            | Magnoliophyta | 10.1111/nph.14524                                                                       | Leguminosae     | <i>Gilbertiodendron</i>                                           | 20                    | 33                   | 27                        | 22                 |
| <b>Estrella et al. (2017)</b>            | Magnoliophyta | 10.1111/nph.14523                                                                       | Leguminosae     | <i>Daniellia</i>                                                  | 16                    | 54                   | 8                         | 7                  |
| <b>Estrella et al. (2017)</b>            | Magnoliophyta | 10.1111/nph.14523                                                                       | Leguminosae     | <i>Bikinia</i>                                                    | 12                    | 22                   | 10                        | 6                  |
| <b>Estrella et al. (2017)</b>            | Magnoliophyta | 10.1111/nph.14523                                                                       | Leguminosae     | <i>Hymenostegia</i>                                               | 25.5                  | 33                   | 15                        | 7                  |
| <b>Estrella et al. (2017)</b>            | Magnoliophyta | 10.1111/nph.14523                                                                       | Leguminosae     | <i>Aphanocalyx</i>                                                | 47                    | 49.5                 | 14                        | 8                  |
| <b>Faye et al. (2016)</b>                | Magnoliophyta | 10.1111/boj.12454                                                                       | Arecaceae       | <i>Oncocalamus</i>                                                | 8                     | 31                   | 4                         | 3                  |
| <b>Faye et al. (2016b)</b>               | Magnoliophyta | 10.1111/boj.12454                                                                       | Arecaceae       | <i>Laccosperma</i>                                                | 9.7                   | 27.4                 | 7                         | 6                  |
| <b>Faye et al. (2016b)</b>               | Magnoliophyta | 10.1111/boj.12454                                                                       | Arecaceae       | <i>Eremospatha</i>                                                | 16.6                  | 27.4                 | 11                        | 9                  |
| <b>Gizaw et al. (2016)</b>               | Magnoliophyta | 10.1111/nph.13937                                                                       | Caryophyllaceae | <i>Lychnis</i> (African clade, before as <i>Uebelinia</i> )       | 4.12                  | 5.16                 | 6                         | 6                  |
| <b>Holstein &amp; Renner (2011)</b>      | Magnoliophyta | 10.1186/1471-2148-11-28                                                                 | Cucurbitaceae   | <i>Coccinia</i>                                                   | 13.5                  | 16                   | 27                        | 24                 |
| <b>Koenen et al. (2015)</b>              | Magnoliophyta | 10.1111/nph.13490                                                                       | Meliaceae       | <i>Carapa</i>                                                     | 7.4                   | 20                   | 27                        | 24                 |
| <b>Koenen et al. (2015)</b>              | Magnoliophyta | 10.1111/nph.13490                                                                       | Meliaceae       | <i>Heckeldora</i>                                                 | 15                    | 20                   | 7                         | 7                  |
| <b>Koenen et al. (2015)</b>              | Magnoliophyta | 10.1111/nph.13490                                                                       | Meliaceae       | <i>Lepalaea</i>                                                   | 17                    | 20                   | 7                         | 7                  |
| <b>Linder et al. (2013)</b>              | Magnoliophyta | 10.1111/jbi.12070                                                                       | Poaceae         | <i>Pentameris</i> (African clade)                                 | 2.1                   | 3.8                  | 4                         | 2                  |
| <b>Lu et al. (2013)</b>                  | Magnoliophyta | 10.1016/j.ympcv.2013.04.023                                                             | Vitaceae        | <i>Cyphostemma</i>                                                | 34.27                 | 66                   | 150                       | 39                 |
| <b>Migliore et al. (2019)</b>            | Magnoliophyta | 10.1111/jbi.13476                                                                       | Annonaceae      | <i>Greenwayodendron</i>                                           | 11.46                 | 28                   | 5                         | 5                  |
| <b>Monthe et al. (2019)</b>              | Magnoliophyta | 10.1016/j.ppees.2019.01.002                                                             | Meliaceae       | <i>Khaya</i> (plastome dates)                                     | 4.06                  | 36.04                | 8                         | 8                  |

| <i>Reference</i>                                | % sp. sampled | Inferred vegetation zone | Altitude mean (m) | Altitude minimum (m) | Altitude maximum (m) | Altitude difference (m) | No. of occurrences used from GBIF after cleaning |
|-------------------------------------------------|---------------|--------------------------|-------------------|----------------------|----------------------|-------------------------|--------------------------------------------------|
| <b>Voelker <i>et al.</i> (2010)</b>             | 100           | <b>premontane</b>        | 1052              | 1                    | 3318                 | 3317                    | 1637                                             |
| <b>Antonelli (2009)</b>                         | 20            | <b>montane</b>           | 1702              | 0                    | 4483                 | 4483                    | 1481                                             |
| <b>Auvrey <i>et al.</i> (2010)</b>              | 49            | <b>lowland</b>           | 475               | 2                    | 1541                 | 1539                    | 1723                                             |
| <b>Bouchenak-Khelladi <i>et al.</i> (2010a)</b> | 27            | <b>lowland</b>           | 664               | 0                    | 2480                 | 2480                    | 2820                                             |
| <b>Bouchenak-Khelladi <i>et al.</i> (2010a)</b> | 84            | <b>premontane</b>        | 875               | 0                    | 2998                 | 2998                    | 2845                                             |
| <b>Couvreur <i>et al.</i> (2011b)</b>           | 93            | <b>lowland</b>           | 270               | 3                    | 1100                 | 1097                    | 956                                              |
| <b>Couvreur <i>et al.</i> (2011b)</b>           | 70            | <b>lowland</b>           | 309               | 3                    | 1245                 | 1242                    | 839                                              |
| <b>Davis <i>et al.</i> (2002)</b>               | 48            | <b>lowland</b>           | 164               | 1                    | 730                  | 729                     | 840                                              |
| <b>Dimitrov <i>et al.</i> (2012)</b>            | 83            | <b>premontane</b>        | 875               | 5                    | 2301                 | 2296                    | 179                                              |
| <b>Donkpegan <i>et al.</i> (2017)</b>           | 55            | <b>lowland</b>           | 267               | 2                    | 1030                 | 1028                    | 741                                              |
| <b>Estrella <i>et al.</i> (2017)</b>            | 57            | <b>lowland</b>           | 182               | 10                   | 645                  | 635                     | 732                                              |
| <b>Estrella <i>et al.</i> (2017)</b>            | 81            | <b>lowland</b>           | 341               | 25                   | 798                  | 773                     | 220                                              |
| <b>Estrella <i>et al.</i> (2017)</b>            | 88            | <b>lowland</b>           | 251               | 1                    | 826                  | 825                     | 314                                              |
| <b>Estrella <i>et al.</i> (2017)</b>            | 60            | <b>lowland</b>           | 407               | 16                   | 942                  | 926                     | 1204                                             |
| <b>Estrella <i>et al.</i> (2017)</b>            | 47            | <b>lowland</b>           | 321               | 10                   | 1087                 | 1077                    | 689                                              |
| <b>Estrella <i>et al.</i> (2017)</b>            | 57            | <b>lowland</b>           | 321               | 5                    | 1148                 | 1143                    | 849                                              |
| <b>Faye <i>et al.</i> (2016)</b>                | 75            | <b>lowland</b>           | 206               | 2                    | 687                  | 685                     | 126                                              |
| <b>Faye <i>et al.</i> (2016b)</b>               | 86            | <b>lowland</b>           | 279               | 6                    | 832                  | 826                     | 385                                              |
| <b>Faye <i>et al.</i> (2016b)</b>               | 82            | <b>lowland</b>           | 283               | 5                    | 992                  | 987                     | 400                                              |
| <b>Gizaw <i>et al.</i> (2016)</b>               | 100           | <b>montane</b>           | 2625              | 1393                 | 4049                 | 2656                    | 165                                              |
| <b>Holstein &amp; Renner (2011)</b>             | 89            | <b>premontane</b>        | 849               | 2                    | 3061                 | 3059                    | 674                                              |
| <b>Koenen <i>et al.</i> (2015)</b>              | 89            | <b>lowland</b>           | 274               | 0                    | 961                  | 961                     | 606                                              |
| <b>Koenen <i>et al.</i> (2015)</b>              | 100           | <b>lowland</b>           | 285               | 13                   | 1114                 | 1101                    | 359                                              |
| <b>Koenen <i>et al.</i> (2015)</b>              | 100           | <b>lowland</b>           | 344               | 10                   | 1114                 | 1104                    | 381                                              |
| <b>Linder <i>et al.</i> (2013)</b>              | 50            | <b>montane</b>           | 2228              | 4                    | 4672                 | 4668                    | 265                                              |
| <b>Lu <i>et al.</i> (2013)</b>                  | 26            | <b>premontane</b>        | 947               | 1                    | 2653                 | 2652                    | 1756                                             |
| <b>Migliore <i>et al.</i> (2019)</b>            | 100           | <b>lowland</b>           | 168               | 1                    | 634                  | 633                     | 325                                              |
| <b>Monthe <i>et al.</i> (2019)</b>              | 100           | <b>lowland</b>           | 250               | 7                    | 862                  | 855                     | 339                                              |

| <i>Reference</i>                     | <i>Clade</i>  | <i>DOI or stable link</i>        | <i>Family</i>           | <i>Genus</i>                                                                                                  | <b>Crown age (Ma)</b> | <b>Stem age (Ma)</b> | <b>Total sp. in clade</b> | <b>Sampled sp.</b> |
|--------------------------------------|---------------|----------------------------------|-------------------------|---------------------------------------------------------------------------------------------------------------|-----------------------|----------------------|---------------------------|--------------------|
| <b>Monthe et al. (2019)</b>          | Magnoliophyta | 10.1016/j.ppees.2019.01.002      | Meliaceae               | <i>Entandrophragma</i> (plastome dates)                                                                       | 10.33                 | 36.04                | 11                        | 11                 |
| <b>Schaefer &amp; Renner (2010)</b>  | Magnoliophyta | 10.1016/j.ympcv.2009.08.006      | Cucurbitaceae           | <i>Momordica</i>                                                                                              | 35.4                  | 45                   | 59                        | 58                 |
| <b>Tosso et al. (2018)</b>           | Magnoliophyta | 10.1016/j.ympcv.2017.11.026      | Fabaceae                | <i>Guibourtia</i>                                                                                             | 17.86                 | 36.7                 | 15                        | 15                 |
| <b>Bohoussou et al. (2015)</b>       | Mammalia      | 10.1111/jbi.12570                | Muridae                 | <i>Malacomys</i>                                                                                              | 3.78                  | 0                    | 3                         | 3                  |
| <b>Bryja et al. (2014)</b>           | Mammalia      | 10.1186/s12862-014-0256-2        | Muridae                 | <i>Mus</i>                                                                                                    | 8                     | 0                    | 28                        | 28                 |
| <b>Cunha Almeida et al. (2016)</b>   | Mammalia      | 10.3161/15081109ACC2016.18.1.003 | Pteropodidae            | <i>Epomops, Hypsignathus, Nanonycteris, Epomophorus, Micropteropus</i>                                        | 3.6                   | 7.6                  | 15                        | 7                  |
| <b>Cunha Almeida et al. (2016)</b>   | Mammalia      | 10.3161/15081109ACC2016.18.1.003 | Pteropodidae            | <i>Myonycteris, Megaloglossus</i>                                                                             | 6.6                   | 7.6                  | 7                         | 7                  |
| <b>Dolotovskaya et al. (2017)</b>    | Mammalia      | 10.1093/zoolinnean/zlx001        | Primate                 | <i>Papio</i>                                                                                                  | 2.51                  | 5.79                 | 6                         | 6                  |
| <b>Dolotovskaya et al. (2017)</b>    | Mammalia      | 10.1093/zoolinnean/zlx001        | Primate                 | <i>Chlorocebus</i>                                                                                            | 3.5                   | 9.45                 | 6                         | 6                  |
| <b>Guschanski et al. (2013)</b>      | Mammalia      | 10.1093/sysbio/syt018            | Cercopitheciinae        | Tribe <i>Cercopithecini</i> :<br><i>Cercopithecus, Miopithecus, Allenopithecus, Erythrocebus, Chlorocebus</i> | 9.6                   | 12.3                 | 63                        | 62                 |
| <b>Hassanin et al. (2012)</b>        | Mammalia      | 10.1016/j.crv.2011.11.002        | Tragulidae              | <i>Hyemoschus</i>                                                                                             | 6.8                   | 31                   | 10                        | 10                 |
| <b>Hassanin et al. (2015)</b>        | Mammalia      | 10.1016/j.crv.2014.12.003        | Pteropodidae            | <i>Scotonycteris, Casinycteris</i>                                                                            | 5.1                   | 11.4                 | 4                         | 4                  |
| <b>Johnston &amp; Anthony (2012)</b> | Mammalia      | 10.1186/1471-2148-12-120         | Cephalophinae / Bovidae | <i>Cephalophus</i>                                                                                            | 7.03                  | 8.73                 | 16                        | 16                 |
| <b>Mikula et al. (2016)</b>          | Mammalia      | 10.1111/zsc.12179                | Nesomyidae              | <i>Saccostomus</i>                                                                                            | 3.9                   | 9                    | 5                         | 5                  |
| <b>Nicolas et al. (2019)</b>         | Mammalia      | 10.1016/j.ympcv.2019.106703      | Muridae                 | <i>Hylomyscus</i>                                                                                             | 5.7                   | 7.4                  | 26                        | 24                 |
| <b>Olayemi et al. (2012)</b>         | Mammalia      | 10.1111/j.1096-3642.2012.00823.x | Nesomyidae              | <i>Cricetomys</i>                                                                                             | 5.7                   | 0                    | 6                         | 6                  |
| <b>Pozzi (2016)</b>                  | Mammalia      | 10.1111/jbi.12846                | Galagidae               | <i>Galagidae</i>                                                                                              | 34                    | 43                   | 18                        | 17                 |
| <b>Springer et al. (2012)</b>        | Mammalia      | 10.1371/journal.pone.0049521     | Colobidae               | <i>Ptilocolobus</i>                                                                                           | 3.63                  | 7.19                 | 17                        | 9                  |
| <b>Taylor et al. (2014)</b>          | Mammalia      | 10.1111/bij.12317                | Muridae                 | <i>Otomys</i>                                                                                                 | 3.94                  | 0                    | 19                        | 16                 |
| <b>Gaubert et al. (2018)</b>         | Pholidota     | 10.1093/jhered/esx097            | Manidae                 | African Pangolins (genera <i>Phataginus, Smutsia</i> )                                                        | 22.9                  | 37.9                 | 6                         | 6                  |
| <b>Ceccarelli et al. (2014)</b>      | Reptilia      | 10.1016/j.ympcv.2014.07.023      | Chamaeleonidae          | <i>Trioceros</i>                                                                                              | 35                    | 43                   | 40                        | 25                 |
| <b>Greenbaum et al. (2015)</b>       | Reptilia      | 10.1080/21564574.2014.996189     | Lamprophiidae           | <i>Boaedon</i>                                                                                                | 20.99                 | 25.54                | 6                         | 5                  |

| <i>Reference</i>                          | % sp. sampled | Inferred vegetation zone                        | Altitude mean (m) | Altitude minimum (m) | Altitude maximum (m) | Altitude difference (m) | No. of occurrences used from GBIF after cleaning |
|-------------------------------------------|---------------|-------------------------------------------------|-------------------|----------------------|----------------------|-------------------------|--------------------------------------------------|
| <b>Monthe <i>et al.</i> (2019)</b>        | 100           | lowland                                         | 360               | 7                    | 1110                 | 1103                    | 392                                              |
| <b>Schaefer &amp; Renner (2010)</b>       | 98            | lowland                                         | 650               | 1                    | 2575                 | 2574                    | 1102                                             |
| <b>Tosso <i>et al.</i> (2018)</b>         | 100           | lowland                                         | 230               | 1                    | 951                  | 950                     | 566                                              |
| <b>Bohoussou <i>et al.</i> (2015)</b>     | 100           | lowland                                         | 407               | 8                    | 1149                 | 1141                    | 1904                                             |
| <b>Bryja <i>et al.</i> (2014)</b>         | 100           | premontane                                      | 1072              | 11                   | 3431                 | 3420                    | 2652                                             |
| <b>Cunha Almeida <i>et al.</i> (2016)</b> | 47            | lowland                                         | 496               | 2                    | 2605                 | 2603                    | 5382                                             |
| <b>Cunha Almeida <i>et al.</i> (2016)</b> | 100           | premontane                                      | 859               | 6                    | 2638                 | 2632                    | 1024                                             |
| <b>Dolotovskaya <i>et al.</i> (2017)</b>  | 100           | premontane                                      | 951               | 1                    | 2193                 | 2192                    | 479                                              |
| <b>Dolotovskaya <i>et al.</i> (2017)</b>  | 100           | premontane                                      | 851               | 1                    | 2708                 | 2707                    | 524                                              |
| <b>Guschanski <i>et al.</i> (2013)</b>    | 98            | lowland                                         | 558               | 1                    | 2708                 | 2707                    | 1873                                             |
| <b>Hassanin <i>et al.</i> (2012)</b>      | 100           | lowland                                         | 346               | 27                   | 927                  | 900                     | 15                                               |
| <b>Hassanin <i>et al.</i> (2015)</b>      | 100           | lowland                                         | 521               | 12                   | 1542                 | 1530                    | 132                                              |
| <b>Johnston &amp; Anthony (2012)</b>      | 100           | lowland                                         | 528               | 2                    | 1891                 | 1889                    | 226                                              |
| <b>Mikula <i>et al.</i> (2016)</b>        | 100           | premontane                                      | 898               | 1                    | 2019                 | 2018                    | 959                                              |
| <b>Nicolas <i>et al.</i> (2019)</b>       | 92            | premontane                                      | 1218              | 44                   | 3395                 | 3351                    | 2903                                             |
| <b>Olayemi <i>et al.</i> (2012)</b>       | 100           | premontane                                      | 745               | 2                    | 2368                 | 2366                    | 1347                                             |
| <b>Pozzi (2016)</b>                       | 94            | lowland                                         | 648               | 2                    | 2502                 | 2500                    | 1506                                             |
| <b>Springer <i>et al.</i> (2012)</b>      | 53            | lowland                                         | 599               | 1                    | 1947                 | 1946                    | 223                                              |
| <b>Taylor <i>et al.</i> (2014)</b>        | 84            | montane                                         | 1896              | 4                    | 4518                 | 4514                    | 1731                                             |
| <b>Gaubert <i>et al.</i> (2018)</b>       | 100           | premontane (based on genus <i>Smutsia</i> only) | 968               | 605                  | 1174                 | 569                     | 7                                                |
| <b>Ceccarelli <i>et al.</i> (2014)</b>    | 63            | montane                                         | 1516              | 15                   | 3404                 | 3389                    | 1377                                             |
| <b>Greenbaum <i>et al.</i> (2015)</b>     | 83            | premontane                                      | 790               | 2                    | 2587                 | 2585                    | 1439                                             |

| <i>Reference</i>                     | <i>Clade</i> | <i>DOI or stable link</i>        | <i>Family</i>   | <i>Genus</i>        | <b>Crown age (Ma)</b> | <b>Stem age (Ma)</b> | <b>Total sp. in clade</b> | <b>Sampled sp.</b> |
|--------------------------------------|--------------|----------------------------------|-----------------|---------------------|-----------------------|----------------------|---------------------------|--------------------|
| <b>Leaché <i>et al.</i> (2014)</b>   | Reptilia     | 10.1016/j.ympcv.2014.06.013      | Agamidea        | <i>Agama</i>        | 23                    | 25                   | 45                        | 43                 |
| <b>Menegon <i>et al.</i> (2014)</b>  | Reptilia     | 10.1016/j.ympcv.2014.06.007      | Viperidae       | <i>Atheris</i>      | 15                    | 25                   | 15                        | 10                 |
| <b>Portillo <i>et al.</i> (2018)</b> | Reptilia     | 10.1016/j.ympcv.2018.03.019      | Atractaspidinae | <i>Aparallactus</i> | 24                    | 28                   | 11                        | 7                  |
| <b>Tolley <i>et al.</i> (2011)</b>   | Reptilia     | 10.1111/j.1365-2699.2011.02529.x | Chamaeleonidae  | <i>Kinyongia</i>    | 29                    | 32                   | 23                        | 16                 |
| <b>Tolley <i>et al.</i> (2013)</b>   | Reptilia     | 10.1098/rspb.2013.0184           | Chamaeleonidae  | <i>Rieppeleon</i>   | 25                    | 35                   | 4                         | 3                  |
| <b>Tolley <i>et al.</i> (2013)</b>   | Reptilia     | 10.1098/rspb.2013.0184           | Chamaeleonidae  | <i>Bradypodion</i>  | 12                    | 45                   | 34                        | 17                 |
| <b>Tolley <i>et al.</i> (2013)</b>   | Reptilia     | 10.1098/rspb.2013.0184           | Chamaeleonidae  | <i>Rhampholeon</i>  | 42                    | 50                   | 22                        | 13                 |
| <b>Tolley <i>et al.</i> (2013)</b>   | Reptilia     | 10.1098/rspb.2013.0184           | Chamaeleonidae  | <i>Chamaeleo</i>    | 39                    | 47                   | 14                        | 13                 |

| <i>Reference</i>                     | % sp. sampled | Inferred vegetation zone | Altitude mean (m) | Altitude minimum (m) | Altitude maximum (m) | Altitude difference (m) | No. of occurrences used from GBIF after cleaning |
|--------------------------------------|---------------|--------------------------|-------------------|----------------------|----------------------|-------------------------|--------------------------------------------------|
| <b>Leaché <i>et al.</i> (2014)</b>   | 96            | <b>premontane</b>        | 837               | 2                    | 2236                 | 2234                    | 2830                                             |
| <b>Menegon <i>et al.</i> (2014)</b>  | 67            | <b>premontane</b>        | 1349              | 13                   | 2355                 | 2342                    | 317                                              |
| <b>Portillo <i>et al.</i> (2018)</b> | 64            | <b>premontane</b>        | 868               | 4                    | 2310                 | 2306                    | 726                                              |
| <b>Tolley <i>et al.</i> (2011)</b>   | 70            | <b>montane</b>           | 1516              | 252                  | 2799                 | 2547                    | 131                                              |
| <b>Tolley <i>et al.</i> (2013)</b>   | 75            | <b>lowland</b>           | 431               | 4                    | 1830                 | 1826                    | 116                                              |
| <b>Tolley <i>et al.</i> (2013)</b>   | 50            | <b>premontane</b>        | 773               | 1                    | 2250                 | 2249                    | 483                                              |
| <b>Tolley <i>et al.</i> (2013)</b>   | 59            | <b>premontane</b>        | 1281              | 16                   | 2546                 | 2530                    | 256                                              |
| <b>Tolley <i>et al.</i> (2013)</b>   | 93            | <b>premontane</b>        | 1015              | 2                    | 2906                 | 2904                    | 2355                                             |
